# Supplementary material for: What can we learn about tropospheric OH from satellite observations of methane?
Source: Copernicus journal article supplement (doi:10.5194/acp-25-2947-2025), 2025-03-11
Supplement: Supplementary file 1 [file acp-25-2947-2025-supplement.pdf]

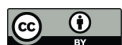

*Supplement of*

## **What can we learn about tropospheric OH from satellite observations of methane?**

**Elise Penn et al.**

*Correspondence to:* Elise Penn (epenn@g.harvard.edu)

The copyright of individual parts of the supplement might differ from the article licence.

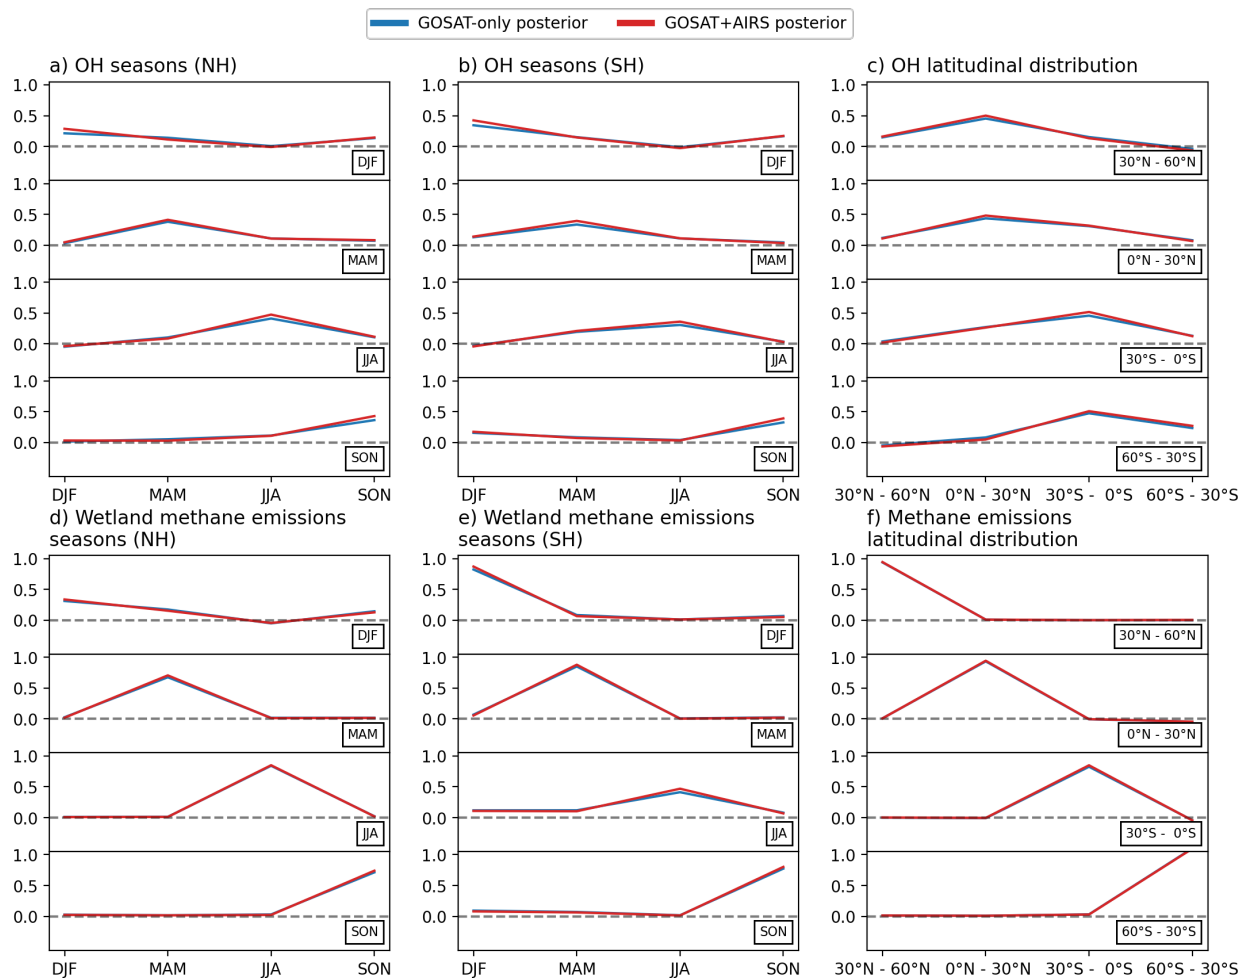

**Figure S1: Ability of inversions using GOSAT and GOSAT+AIRS methane column retrievals to quantify seasonal and latitudinal variabilities of both methane emissions and [OH]. All plots show rows of the reduced averaging kernel matrix, which describe the ability of the observing system to separately quantify [OH] in different latitudinal bands. A perfect observing system would have an averaging kernel sensitivity of 1 for the reduced state vector element of interest (perfect characterization) and 0 for other elements (no error correlation). Because we find posterior emissions and [OH] in terms of relative correction to the prior, all averaging kernel elements are unitless, including off-diagonals.**

20
